# Supplementary material
Source: PubMed Central journal article supplement (PMC3637951)
Supplement: NIHMS458826-supplement-suppl__fig_2.pdf [file NIHMS458826-supplement-suppl__fig_2.pdf]

**Fig. S2**

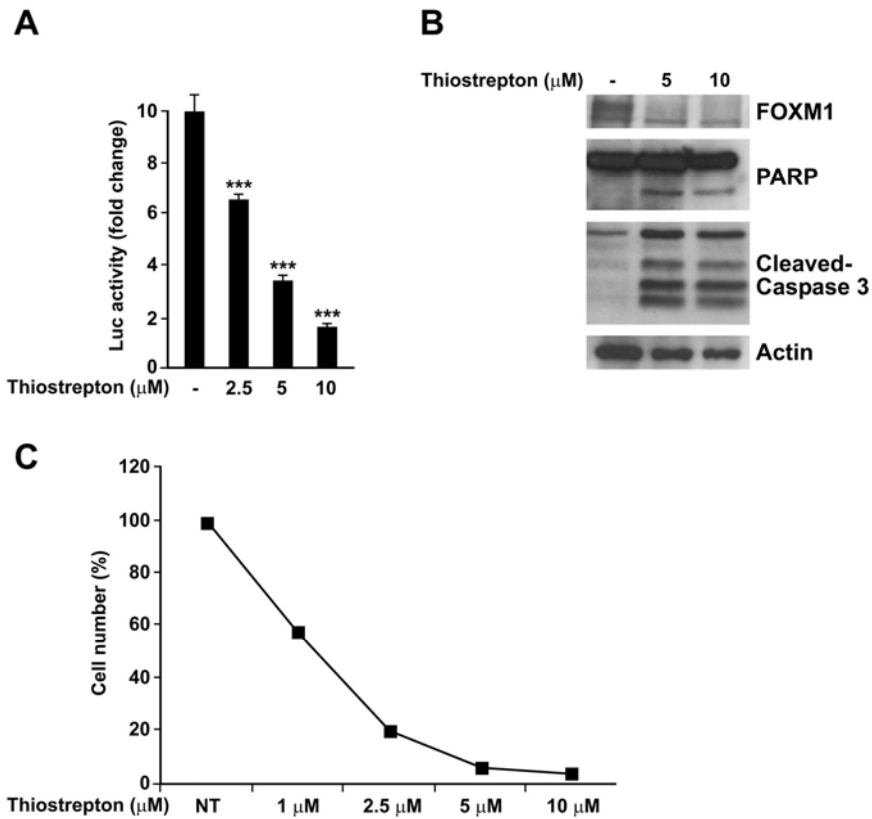

**Supplementary Figure 2** Thiostrepton reduces FOXM1 transcriptional activity and protein levels and leads to ATC cells death. A) 8505c cells were transfected with the FOXM1 activity reporter 6XCDX2; 36 hours post-transfection, cells were treated or not for 12 hours with the indicated concentrations of thiostrepton. Normalized luciferase levels are reported as average results of three independent experiments with bars illustrating 95% confidence intervals. Reporter activity in untreated cells was arbitrary set at 10; (\*\*\*,  $p < 0.001$ ). B) Western Blot analysis of FOXM1, cleaved caspase 3 and PARP1 in 8505c cells treated or not with different concentrations of thiostrepton. Actin is shown for normalization. C) Survival curve of 8505c cells treated or not for 48 h with the indicated concentrations of thiostrepton. Data are the average of three independent cell counts.
