# Supplementary material
Source: PubMed Central journal article supplement (PMC3637951)
Supplement: NIHMS458826-supplement-suppl__tab_1.pdf [file NIHMS458826-supplement-suppl__tab_1.pdf]

**Supplementary Table 1** FOXM1 expression by immunohistochemistry in WDTC (PTC and FTC)

| Sample Diagnosis                    | Number of cases in each category |               |                       |                    |
|-------------------------------------|----------------------------------|---------------|-----------------------|--------------------|
|                                     | Negative (-)*                    | Low/Weak (+)* | Medium/Moderate (++)* | High/Strong (+++)* |
| PTC-CV<br>(13 cases)                | 7                                | 6             | 0                     | 0                  |
| PTC-CV TC areas (<20%)<br>(7 cases) | 2                                | 5             | 0                     | 0                  |
| PTC-FV<br>(8 cases)                 | 8                                | 0             | 0                     | 0                  |
| PTC-SF<br>(4 cases)                 | 1                                | 3             | 0                     | 0                  |
| PTC-TCV<br>(4 cases)                | 0                                | 4             | 0                     | 0                  |
| FTC<br>(10 cases)                   | 8                                | 2             | 0                     | 0                  |

\*: Score is reported as in Table 1
