# Supplementary material
Source: PubMed Central journal article supplement (PMC3637951)
Supplement: NIHMS458826-supplement-suppl__tab_2.pdf [file NIHMS458826-supplement-suppl__tab_2.pdf]

**Supplementary Table 2** FOXM1 expression by immunohistochemistry in invasive and metastasizing PTCs

| Sample Diagnosis                                     | Number of cases in each category |               |                       |                    |
|------------------------------------------------------|----------------------------------|---------------|-----------------------|--------------------|
|                                                      | Negative (-)*                    | Low/Weak (+)* | Medium/Moderate (++)* | High/Strong (+++)* |
| PTC (infiltrating tumor capsule)<br>(27 cases)       | 10                               | 17            | 0                     | 0                  |
| PTC (non infiltrating tumor capsule)<br>(9 cases)    | 8                                | 1             | 0                     | 0                  |
|                                                      |                                  |               |                       |                    |
| PTC (infiltrating thyroid capsule)<br>(13 cases)     | 2                                | 11            | 0                     | 0                  |
| PTC (non infiltrating thyroid capsule)<br>(23 cases) | 16                               | 7             | 0                     | 0                  |
|                                                      |                                  |               |                       |                    |
| PTC (with node metastases)<br>(14 cases)             | 5                                | 9             | 0                     | 0                  |
| PTC (without node metastases)<br>(22 cases)          | 13                               | 9             | 0                     | 0                  |

\*: Score is reported as in Table 1
