# Supplementary material
Source: PubMed Central journal article supplement (PMC3637951)
Supplement: NIHMS458826-supplement-suppl_fig_1.pdf [file NIHMS458826-supplement-suppl_fig_1.pdf]

**Fig. S1**

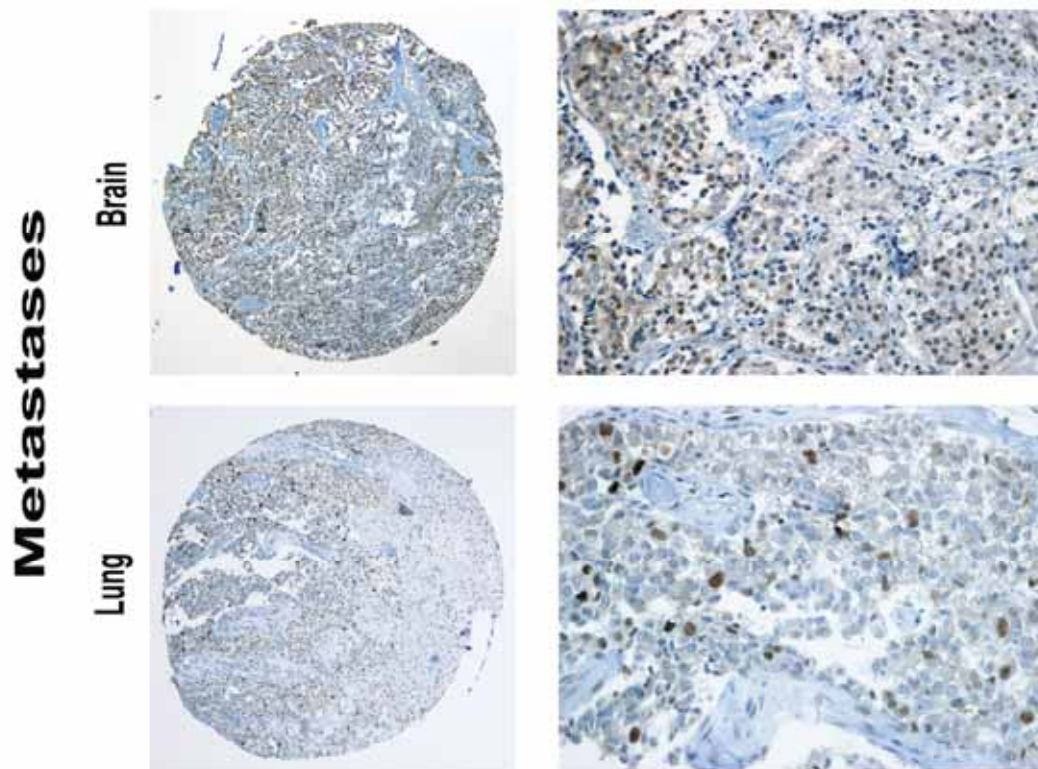

**Supplementary Figure 1** FOXM1 is expressed in distant metastases of PDC — We could study three cases of distant metastases: case A): the metastasis was better differentiated than the primary tumour (primary = PDC and metastasis = FTC) and neither one expressed FOXM1; case B): The lung metastasis (bottom) was positive for FOXM1 (30%) but the primary PDC could not be included in the TMA; case C): the brain metastasis (top) was positive for FOXM1 (45-50%) while the primary tumour (PDC) did not express FOXM1. Low power views of entire tissue cores (left, 10X) and high power views of areas present within these cores (right, 40X) are displayed. *Top*: Brain metastasis of a PDC case featuring widespread, (++) nuclear staining. *Bottom*: Lung metastasis of a PDC case displaying scattered metastatic cells positive for FOXM1 (++)
