# Supplementary material
Source: PubMed Central journal article supplement (PMC3637951)
Supplement: NIHMS458826-supplement-Text.pdf [file NIHMS458826-supplement-Text.pdf]

## Supplementary Materials and methods

### Reverse Transcriptase PCR

Semiquantitative RT-PCR was performed to detect specific FOXM1 splicing isoforms. The following primers were used:

Fox-F2 (5'-GCGACTCTCGAGCATGGAGAATTGTCACCTG-3') and

Fox-R2, (5'-GCGCTACTCGAGTTCGGTTTTGATGGT-3'), encompassing A1 exon;

Fox-F3 (5'-GGGCGCACGGCGGAAGATGAA-3') and

Fox-R3 (5'-CCACTCTTCCAAGGAGGGCTC-3'), encompassing A2 exon.

Quantitative RT-PCR was applied to study FOXM1 target genes; amplimers and annealing temperatures were as follows:

Plk1-F: 5'-AAGAGATCCCGGAGGTCCTA-3';

Plk1-R: 5'-GGCTTGAGCAGCAGAGACTT-3' (annealing temperature: 60°C);

cyclin B1-F: 5'-GCTCTTGGGGACATTGGTAA-3';

cyclin B1-R: 5'-TCTGGCACTGGATCAGACAC-3' (annealing temperature: 60°C);

aurora B-F: 5'-CCTATCGCCGCATCGTCAAG-3' ;

aurora B-R: 5'-GCAGCACCTCCGAGAGTTG-3' (annealing temperature: 60°C);

Skp2-F: 5'-GGTGTGGTAAGAGGTGGTATCGC-3';

Skp2-R: 5'-CACGAAAAGGGCTGAAATGTTC-3' (annealing temperature: 60°C);

uPA-F: 5'-CCAAAGGCAGCAATGAACTT-3';

uPA-R: 5'-CCCCTCATAGCAGGTTTTTG-3' (annealing temperature: 60°C)
